# Supplementary material
Source: MDPI journal article supplement (https://www.mdpi.com/2071-1050/16/4/1389)
Supplement: s1 [file s1]

# Supplementary Tables S6–S16

**Table S6.** The probability distribution of the collective evaluation values for students.

| Students | Criteria | S6  | S5  | S4  | S3  | S2  | S1  | S0  |
|----------|----------|-----|-----|-----|-----|-----|-----|-----|
| $A_1$    | $C_1$    | 0.0 | 0.4 | 0.3 | 0.3 | 0.0 | 0.0 | 0.0 |
|          | $C_2$    | 0.1 | 0.8 | 0.1 | 0.0 | 0.0 | 0.0 | 0.0 |
|          | $C_3$    | 0.3 | 0.7 | 0.0 | 0.0 | 0.0 | 0.0 | 0.0 |
|          | $C_4$    | 0.5 | 0.4 | 0.1 | 0.0 | 0.0 | 0.0 | 0.0 |
|          | $C_5$    | 0.0 | 0.9 | 0.1 | 0.0 | 0.0 | 0.0 | 0.0 |
| $A_2$    | $C_1$    | 0.0 | 0.0 | 0.4 | 0.4 | 0.2 | 0.0 | 0.0 |
|          | $C_2$    | 0.0 | 0.0 | 0.3 | 0.7 | 0.0 | 0.0 | 0.0 |
|          | $C_3$    | 0.0 | 0.0 | 0.3 | 0.7 | 0.0 | 0.0 | 0.0 |
|          | $C_4$    | 0.0 | 0.0 | 0.3 | 0.3 | 0.4 | 0.0 | 0.0 |
|          | $C_5$    | 0.0 | 0.2 | 0.8 | 0.0 | 0.0 | 0.0 | 0.0 |
| $A_3$    | $C_1$    | 0.0 | 0.0 | 0.2 | 0.8 | 0.0 | 0.0 | 0.0 |
|          | $C_2$    | 0.0 | 0.0 | 0.0 | 0.6 | 0.4 | 0.0 | 0.0 |
|          | $C_3$    | 0.0 | 0.4 | 0.5 | 0.1 | 0.0 | 0.0 | 0.0 |
|          | $C_4$    | 0.0 | 0.0 | 0.0 | 0.6 | 0.4 | 0.0 | 0.0 |
|          | $C_5$    | 0.0 | 0.8 | 0.2 | 0.0 | 0.0 | 0.0 | 0.0 |
| $A_4$    | $C_1$    | 0.0 | 0.4 | 0.2 | 0.4 | 0.0 | 0.0 | 0.0 |
|          | $C_2$    | 0.0 | 0.0 | 0.5 | 0.5 | 0.0 | 0.0 | 0.0 |
|          | $C_3$    | 0.0 | 0.2 | 0.1 | 0.7 | 0.0 | 0.0 | 0.0 |
|          | $C_4$    | 0.0 | 0.3 | 0.6 | 0.1 | 0.0 | 0.0 | 0.0 |
|          | $C_5$    | 0.0 | 0.0 | 0.7 | 0.3 | 0.0 | 0.0 | 0.0 |

**Table S7.** The exceedance distribution function values of students under five criteria and six linguistic scales.

| Students | EDF <sub>ij</sub> | S6  | S5  | S4  | S3  | S2  | S1  | S0  |
|----------|-------------------|-----|-----|-----|-----|-----|-----|-----|
| $A_1$    | $EDF_{11}$        | 0.0 | 0.4 | 0.7 | 1.0 | 1.0 | 1.0 | 1.0 |
|          | $EDF_{12}$        | 0.1 | 0.9 | 1.0 | 1.0 | 1.0 | 1.0 | 1.0 |
|          | $EDF_{13}$        | 0.3 | 1.0 | 1.0 | 1.0 | 1.0 | 1.0 | 1.0 |
|          | $EDF_{14}$        | 0.5 | 0.9 | 1.0 | 1.0 | 1.0 | 1.0 | 1.0 |
|          | $EDF_5$           | 0.0 | 0.9 | 1.0 | 1.0 | 1.0 | 1.0 | 1.0 |
| $A_2$    | $EDF_{21}$        | 0.0 | 0.0 | 0.4 | 0.8 | 1.0 | 1.0 | 1.0 |
|          | $EDF_{22}$        | 0.0 | 0.0 | 0.3 | 1.0 | 1.0 | 1.0 | 1.0 |
|          | $EDF_{23}$        | 0.0 | 0.0 | 0.3 | 1.0 | 1.0 | 1.0 | 1.0 |
|          | $EDF_{24}$        | 0.0 | 0.0 | 0.3 | 0.6 | 1.0 | 1.0 | 1.0 |
|          | $EDF_{25}$        | 0.0 | 0.2 | 1.0 | 1.0 | 1.0 | 1.0 | 1.0 |
| $A_3$    | $EDF_{31}$        | 0.0 | 0.0 | 0.2 | 1.0 | 1.0 | 1.0 | 1.0 |
|          | $EDF_{32}$        | 0.0 | 0.0 | 0.0 | 0.6 | 1.0 | 1.0 | 1.0 |
|          | $EDF_{33}$        | 0.0 | 0.4 | 0.9 | 1.0 | 1.0 | 1.0 | 1.0 |
|          | $EDF_{34}$        | 0.0 | 0.0 | 0.0 | 0.6 | 1.0 | 1.0 | 1.0 |
|          | $EDF_{35}$        | 0.0 | 0.8 | 1.0 | 1.0 | 1.0 | 1.0 | 1.0 |
| $A_4$    | $EDF_{41}$        | 0.0 | 0.4 | 0.6 | 1.0 | 1.0 | 1.0 | 1.0 |
|          | $EDF_{42}$        | 0.0 | 0.0 | 0.5 | 1.0 | 1.0 | 1.0 | 1.0 |
|          | $EDF_{43}$        | 0.0 | 0.2 | 0.3 | 1.0 | 1.0 | 1.0 | 1.0 |
|          | $EDF_{44}$        | 0.0 | 0.3 | 0.9 | 1.0 | 1.0 | 1.0 | 1.0 |
|          | $EDF_{45}$        | 0.0 | 0.0 | 0.7 | 1.0 | 1.0 | 1.0 | 1.0 |

**Table S8.** The  $u^{th}$  largest value of  $EDF_i^g(u)$  and its corresponding  $C_i^g(u)$ .

| Students | u     | S6                 | S5                 | S4                 | S3                 | S2                 | S1                 | S0                 |
|----------|-------|--------------------|--------------------|--------------------|--------------------|--------------------|--------------------|--------------------|
| $A_1$    | $u=1$ | 0.5/C <sub>4</sub> | 1.0/C <sub>3</sub> | 1.0/C <sub>2</sub> | 1.0/C <sub>1</sub> | 1.0/C <sub>1</sub> | 1.0/C <sub>1</sub> | 1.0/C <sub>1</sub> |
|          | $u=2$ | 0.3/C <sub>3</sub> | 0.9/C <sub>2</sub> | 1.0/C <sub>3</sub> | 1.0/C <sub>2</sub> | 1.0/C <sub>2</sub> | 1.0/C <sub>2</sub> | 1.0/C <sub>2</sub> |
|          | $u=3$ | 0.1/C <sub>2</sub> | 0.9/C <sub>4</sub> | 1.0/C <sub>4</sub> | 1.0/C <sub>3</sub> | 1.0/C <sub>3</sub> | 1.0/C <sub>3</sub> | 1.0/C <sub>3</sub> |
|          | $u=4$ | 0.0/C <sub>1</sub> | 0.9/C <sub>5</sub> | 1.0/C <sub>5</sub> | 1.0/C <sub>4</sub> | 1.0/C <sub>4</sub> | 1.0/C <sub>4</sub> | 1.0/C <sub>4</sub> |
|          | $u=5$ | 0.0/C <sub>5</sub> | 0.4/C <sub>1</sub> | 0.7/C <sub>1</sub> | 1.0/C <sub>5</sub> | 1.0/C <sub>5</sub> | 1.0/C <sub>5</sub> | 1.0/C <sub>5</sub> |
| $A_2$    | $u=1$ | 0.0/C <sub>1</sub> | 0.2/C <sub>5</sub> | 1.0/C <sub>5</sub> | 1.0/C <sub>2</sub> | 1.0/C <sub>1</sub> | 1.0/C <sub>1</sub> | 1.0/C <sub>1</sub> |
|          | $u=2$ | 0.0/C <sub>2</sub> | 0.0/C <sub>1</sub> | 0.4/C <sub>1</sub> | 1.0/C <sub>3</sub> | 1.0/C <sub>2</sub> | 1.0/C <sub>2</sub> | 1.0/C <sub>2</sub> |
|          | $u=3$ | 0.0/C <sub>3</sub> | 0.0/C <sub>2</sub> | 0.3/C <sub>2</sub> | 1.0/C <sub>5</sub> | 1.0/C <sub>3</sub> | 1.0/C <sub>3</sub> | 1.0/C <sub>3</sub> |
|          | $u=4$ | 0.0/C <sub>4</sub> | 0.0/C <sub>3</sub> | 0.3/C <sub>3</sub> | 0.8/C <sub>1</sub> | 1.0/C <sub>4</sub> | 1.0/C <sub>4</sub> | 1.0/C <sub>4</sub> |
|          | $u=5$ | 0.0/C <sub>5</sub> | 0.0/C <sub>4</sub> | 0.3/C <sub>4</sub> | 0.6/C <sub>4</sub> | 1.0/C <sub>5</sub> | 1.0/C <sub>5</sub> | 1.0/C <sub>5</sub> |
| $A_3$    | $u=1$ | 0.0/C <sub>1</sub> | 0.8/C <sub>5</sub> | 1.0/C <sub>5</sub> | 1.0/C <sub>1</sub> | 1.0/C <sub>1</sub> | 1.0/C <sub>1</sub> | 1.0/C <sub>1</sub> |
|          | $u=2$ | 0.0/C <sub>2</sub> | 0.4/C <sub>3</sub> | 0.9/C <sub>3</sub> | 1.0/C <sub>3</sub> | 1.0/C <sub>2</sub> | 1.0/C <sub>2</sub> | 1.0/C <sub>2</sub> |
|          | $u=3$ | 0.0/C <sub>3</sub> | 0.0/C <sub>1</sub> | 0.2/C <sub>1</sub> | 1.0/C <sub>5</sub> | 1.0/C <sub>3</sub> | 1.0/C <sub>3</sub> | 1.0/C <sub>3</sub> |
|          | $u=4$ | 0.0/C <sub>4</sub> | 0.0/C <sub>2</sub> | 0.0/C <sub>2</sub> | 0.6/C <sub>2</sub> | 1.0/C <sub>4</sub> | 1.0/C <sub>4</sub> | 1.0/C <sub>4</sub> |
|          | $u=5$ | 0.0/C <sub>5</sub> | 0.0/C <sub>4</sub> | 0.0/C <sub>4</sub> | 0.6/C <sub>4</sub> | 1.0/C <sub>5</sub> | 1.0/C <sub>5</sub> | 1.0/C <sub>5</sub> |
| $A_4$    | $u=1$ | 0.0/C <sub>1</sub> | 0.4/C <sub>1</sub> | 0.9/C <sub>4</sub> | 1.0/C <sub>1</sub> | 1.0/C <sub>1</sub> | 1.0/C <sub>1</sub> | 1.0/C <sub>1</sub> |
|          | $u=2$ | 0.0/C <sub>2</sub> | 0.3/C <sub>4</sub> | 0.7/C <sub>5</sub> | 1.0/C <sub>2</sub> | 1.0/C <sub>2</sub> | 1.0/C <sub>2</sub> | 1.0/C <sub>2</sub> |
|          | $u=3$ | 0.0/C <sub>3</sub> | 0.2/C <sub>3</sub> | 0.6/C <sub>1</sub> | 1.0/C <sub>3</sub> | 1.0/C <sub>3</sub> | 1.0/C <sub>3</sub> | 1.0/C <sub>3</sub> |
|          | $u=4$ | 0.0/C <sub>4</sub> | 0.0/C <sub>2</sub> | 0.5/C <sub>2</sub> | 1.0/C <sub>4</sub> | 1.0/C <sub>4</sub> | 1.0/C <sub>4</sub> | 1.0/C <sub>4</sub> |
|          | $u=5$ | 0.0/C <sub>5</sub> | 0.0/C <sub>5</sub> | 0.3/C <sub>3</sub> | 1.0/C <sub>5</sub> | 1.0/C <sub>5</sub> | 1.0/C <sub>5</sub> | 1.0/C <sub>5</sub> |

**Table S9.** The criteria subsets  $\mathbb{C}_i^g(u)$  with the largest to  $u^{th}$  largest value of  $EDF_{ij}(g)$ .

| Students | u     | S6                                                                                    | S5                                                                                    | S4                                                                                    | S3                                                                                    | S2                                                                                    | S1                                                                                    | S0                                                                                    |
|----------|-------|---------------------------------------------------------------------------------------|---------------------------------------------------------------------------------------|---------------------------------------------------------------------------------------|---------------------------------------------------------------------------------------|---------------------------------------------------------------------------------------|---------------------------------------------------------------------------------------|---------------------------------------------------------------------------------------|
| $A_1$    | $u=1$ | {C <sub>4</sub> }                                                                     | {C <sub>3</sub> }                                                                     | {C <sub>2</sub> }                                                                     | {C <sub>1</sub> }                                                                     | {C <sub>1</sub> }                                                                     | {C <sub>1</sub> }                                                                     | {C <sub>1</sub> }                                                                     |
|          | $u=2$ | {C <sub>3</sub> , C <sub>4</sub> }                                                    | {C <sub>2</sub> , C <sub>3</sub> }                                                    | {C <sub>2</sub> , C <sub>3</sub> }                                                    | {C <sub>1</sub> , C <sub>2</sub> }                                                    |
|          | $u=3$ | {C <sub>2</sub> , C <sub>3</sub> , C <sub>4</sub> }                                   | {C <sub>2</sub> , C <sub>3</sub> , C <sub>4</sub> }                                   | {C <sub>2</sub> , C <sub>3</sub> , C <sub>4</sub> }                                   | {C <sub>1</sub> , C <sub>2</sub> , C <sub>3</sub> }                                   | {C <sub>1</sub> , C <sub>2</sub> , C <sub>3</sub> }                                   | {C <sub>1</sub> , C <sub>2</sub> , C <sub>3</sub> }                                   | {C <sub>1</sub> , C <sub>2</sub> , C <sub>3</sub> }                                   |
|          | $u=4$ | {C <sub>1</sub> , C <sub>2</sub> , C <sub>3</sub> , C <sub>4</sub> }                  | {C <sub>2</sub> , C <sub>3</sub> , C <sub>4</sub> , C <sub>5</sub> }                  | {C <sub>2</sub> , C <sub>3</sub> , C <sub>4</sub> , C <sub>5</sub> }                  | {C <sub>1</sub> , C <sub>2</sub> , C <sub>3</sub> , C <sub>4</sub> }                  | {C <sub>1</sub> , C <sub>2</sub> , C <sub>3</sub> , C <sub>4</sub> }                  | {C <sub>1</sub> , C <sub>2</sub> , C <sub>3</sub> , C <sub>4</sub> }                  | {C <sub>1</sub> , C <sub>2</sub> , C <sub>3</sub> , C <sub>4</sub> }                  |
|          | $u=5$ | {C <sub>1</sub> , C <sub>2</sub> , C <sub>3</sub> , C <sub>4</sub> , C <sub>5</sub> } | {C <sub>1</sub> , C <sub>2</sub> , C <sub>3</sub> , C <sub>4</sub> , C <sub>5</sub> } | {C <sub>1</sub> , C <sub>2</sub> , C <sub>3</sub> , C <sub>4</sub> , C <sub>5</sub> } | {C <sub>1</sub> , C <sub>2</sub> , C <sub>3</sub> , C <sub>4</sub> , C <sub>5</sub> } | {C <sub>1</sub> , C <sub>2</sub> , C <sub>3</sub> , C <sub>4</sub> , C <sub>5</sub> } | {C <sub>1</sub> , C <sub>2</sub> , C <sub>3</sub> , C <sub>4</sub> , C <sub>5</sub> } | {C <sub>1</sub> , C <sub>2</sub> , C <sub>3</sub> , C <sub>4</sub> , C <sub>5</sub> } |
| $A_2$    | $u=1$ | {C <sub>1</sub> }                                                                     | {C <sub>5</sub> }                                                                     | {C <sub>5</sub> }                                                                     | {C <sub>2</sub> }                                                                     | {C <sub>1</sub> }                                                                     | {C <sub>1</sub> }                                                                     | {C <sub>1</sub> }                                                                     |
|          | $u=2$ | {C <sub>1</sub> , C <sub>2</sub> }                                                    | {C <sub>1</sub> , C <sub>5</sub> }                                                    | {C <sub>1</sub> , C <sub>5</sub> }                                                    | {C <sub>2</sub> , C <sub>3</sub> }                                                    | {C <sub>1</sub> , C <sub>2</sub> }                                                    | {C <sub>1</sub> , C <sub>2</sub> }                                                    | {C <sub>1</sub> , C <sub>2</sub> }                                                    |
|          | $u=3$ | {C <sub>1</sub> , C <sub>2</sub> , C <sub>3</sub> }                                   | {C <sub>1</sub> , C <sub>2</sub> , C <sub>5</sub> }                                   | {C <sub>1</sub> , C <sub>2</sub> , C <sub>5</sub> }                                   | {C <sub>2</sub> , C <sub>3</sub> , C <sub>5</sub> }                                   | {C <sub>1</sub> , C <sub>2</sub> , C <sub>3</sub> }                                   | {C <sub>1</sub> , C <sub>2</sub> , C <sub>3</sub> }                                   | {C <sub>1</sub> , C <sub>2</sub> , C <sub>3</sub> }                                   |
|          | $u=4$ | {C <sub>1</sub> , C <sub>2</sub> , C <sub>3</sub> , C <sub>4</sub> }                  | {C <sub>1</sub> , C <sub>2</sub> , C <sub>3</sub> , C <sub>5</sub> }                  | {C <sub>1</sub> , C <sub>2</sub> , C <sub>3</sub> , C <sub>5</sub> }                  | {C <sub>1</sub> , C <sub>2</sub> , C <sub>3</sub> , C <sub>5</sub> }                  | {C <sub>1</sub> , C <sub>2</sub> , C <sub>3</sub> , C <sub>4</sub> }                  | {C <sub>1</sub> , C <sub>2</sub> , C <sub>3</sub> , C <sub>4</sub> }                  | {C <sub>1</sub> , C <sub>2</sub> , C <sub>3</sub> , C <sub>4</sub> }                  |
|          | $u=5$ | {C <sub>1</sub> , C <sub>2</sub> , C <sub>3</sub> , C <sub>4</sub> , C <sub>5</sub> } | {C <sub>1</sub> , C <sub>2</sub> , C <sub>3</sub> , C <sub>4</sub> , C <sub>5</sub> } | {C <sub>1</sub> , C <sub>2</sub> , C <sub>3</sub> , C <sub>4</sub> , C <sub>5</sub> } | {C <sub>1</sub> , C <sub>2</sub> , C <sub>3</sub> , C <sub>4</sub> , C <sub>5</sub> } | {C <sub>1</sub> , C <sub>2</sub> , C <sub>3</sub> , C <sub>4</sub> , C <sub>5</sub> } | {C <sub>1</sub> , C <sub>2</sub> , C <sub>3</sub> , C <sub>4</sub> , C <sub>5</sub> } | {C <sub>1</sub> , C <sub>2</sub> , C <sub>3</sub> , C <sub>4</sub> , C <sub>5</sub> } |
| $A_3$    | $u=1$ | {C <sub>1</sub> }                                                                     | {C <sub>5</sub> }                                                                     | {C <sub>5</sub> }                                                                     | {C <sub>1</sub> }                                                                     | {C <sub>1</sub> }                                                                     | {C <sub>1</sub> }                                                                     | {C <sub>1</sub> }                                                                     |
|          | $u=2$ | {C <sub>1</sub> , C <sub>2</sub> }                                                    | {C <sub>3</sub> , C <sub>5</sub> }                                                    | {C <sub>3</sub> , C <sub>5</sub> }                                                    | {C <sub>1</sub> , C <sub>3</sub> }                                                    | {C <sub>1</sub> , C <sub>2</sub> }                                                    | {C <sub>1</sub> , C <sub>2</sub> }                                                    | {C <sub>1</sub> , C <sub>2</sub> }                                                    |
|          | $u=3$ | {C <sub>1</sub> , C <sub>2</sub> , C <sub>3</sub> }                                   | {C <sub>1</sub> , C <sub>3</sub> , C <sub>5</sub> }                                   | {C <sub>1</sub> , C <sub>3</sub> , C <sub>5</sub> }                                   | {C <sub>1</sub> , C <sub>3</sub> , C <sub>5</sub> }                                   | {C <sub>1</sub> , C <sub>2</sub> , C <sub>3</sub> }                                   | {C <sub>1</sub> , C <sub>2</sub> , C <sub>3</sub> }                                   | {C <sub>1</sub> , C <sub>2</sub> , C <sub>3</sub> }                                   |
|          | $u=4$ | {C <sub>1</sub> , C <sub>2</sub> , C <sub>3</sub> , C <sub>4</sub> }                  | {C <sub>1</sub> , C <sub>2</sub> , C <sub>3</sub> , C <sub>5</sub> }                  | {C <sub>1</sub> , C <sub>2</sub> , C <sub>3</sub> , C <sub>5</sub> }                  | {C <sub>1</sub> , C <sub>2</sub> , C <sub>3</sub> , C <sub>5</sub> }                  | {C <sub>1</sub> , C <sub>2</sub> , C <sub>3</sub> , C <sub>4</sub> }                  | {C <sub>1</sub> , C <sub>2</sub> , C <sub>3</sub> , C <sub>4</sub> }                  | {C <sub>1</sub> , C <sub>2</sub> , C <sub>3</sub> , C <sub>4</sub> }                  |
|          | $u=5$ | {C <sub>1</sub> , C <sub>2</sub> , C <sub>3</sub> , C <sub>4</sub> , C <sub>5</sub> } | {C <sub>1</sub> , C <sub>2</sub> , C <sub>3</sub> , C <sub>4</sub> , C <sub>5</sub> } | {C <sub>1</sub> , C <sub>2</sub> , C <sub>3</sub> , C <sub>4</sub> , C <sub>5</sub> } | {C <sub>1</sub> , C <sub>2</sub> , C <sub>3</sub> , C <sub>4</sub> , C <sub>5</sub> } | {C <sub>1</sub> , C <sub>2</sub> , C <sub>3</sub> , C <sub>4</sub> , C <sub>5</sub> } | {C <sub>1</sub> , C <sub>2</sub> , C <sub>3</sub> , C <sub>4</sub> , C <sub>5</sub> } | {C <sub>1</sub> , C <sub>2</sub> , C <sub>3</sub> , C <sub>4</sub> , C <sub>5</sub> } |
| $A_4$    | $u=1$ | {C <sub>1</sub> }                                                                     | {C <sub>1</sub> }                                                                     | {C <sub>4</sub> }                                                                     | {C <sub>1</sub> }                                                                     | {C <sub>1</sub> }                                                                     | {C <sub>1</sub> }                                                                     | {C <sub>1</sub> }                                                                     |
|          | $u=2$ | {C <sub>1</sub> , C <sub>2</sub> }                                                    | {C <sub>1</sub> , C <sub>4</sub> }                                                    | {C <sub>4</sub> , C <sub>5</sub> }                                                    | {C <sub>1</sub> , C <sub>2</sub> }                                                    |
|          | $u=3$ | {C <sub>1</sub> , C <sub>2</sub> , C <sub>3</sub> }                                   | {C <sub>1</sub> , C <sub>3</sub> , C <sub>4</sub> }                                   | {C <sub>1</sub> , C <sub>4</sub> , C <sub>5</sub> }                                   | {C <sub>1</sub> , C <sub>2</sub> , C <sub>3</sub> }                                   | {C <sub>1</sub> , C <sub>2</sub> , C <sub>3</sub> }                                   | {C <sub>1</sub> , C <sub>2</sub> , C <sub>3</sub> }                                   | {C <sub>1</sub> , C <sub>2</sub> , C <sub>3</sub> }                                   |
|          | $u=4$ | {C <sub>1</sub> , C <sub>2</sub> , C <sub>3</sub> , C <sub>4</sub> }                  | {C <sub>1</sub> , C <sub>2</sub> , C <sub>3</sub> , C <sub>4</sub> }                  | {C <sub>1</sub> , C <sub>2</sub> , C <sub>4</sub> , C <sub>5</sub> }                  | {C <sub>1</sub> , C <sub>2</sub> , C <sub>3</sub> , C <sub>4</sub> }                  | {C <sub>1</sub> , C <sub>2</sub> , C <sub>3</sub> , C <sub>4</sub> }                  | {C <sub>1</sub> , C <sub>2</sub> , C <sub>3</sub> , C <sub>4</sub> }                  | {C <sub>1</sub> , C <sub>2</sub> , C <sub>3</sub> , C <sub>4</sub> }                  |
|          | $u=5$ | {C <sub>1</sub> , C <sub>2</sub> , C <sub>3</sub> , C <sub>4</sub> , C <sub>5</sub> } | {C <sub>1</sub> , C <sub>2</sub> , C <sub>3</sub> , C <sub>4</sub> , C <sub>5</sub> } | {C <sub>1</sub> , C <sub>2</sub> , C <sub>3</sub> , C <sub>4</sub> , C <sub>5</sub> } | {C <sub>1</sub> , C <sub>2</sub> , C <sub>3</sub> , C <sub>4</sub> , C <sub>5</sub> } | {C <sub>1</sub> , C <sub>2</sub> , C <sub>3</sub> , C <sub>4</sub> , C <sub>5</sub> } | {C <sub>1</sub> , C <sub>2</sub> , C <sub>3</sub> , C <sub>4</sub> , C <sub>5</sub> } | {C <sub>1</sub> , C <sub>2</sub> , C <sub>3</sub> , C <sub>4</sub> , C <sub>5</sub> } |

**Table S10.** The fuzzy measures of the criteria set  $\mathbb{C}_i^g(u)$  for students under each linguistic scale.

| Students | u     | s <sub>6</sub> | s <sub>5</sub> | s <sub>4</sub> | s <sub>3</sub> | s <sub>2</sub> | s <sub>1</sub> | s <sub>0</sub> |
|----------|-------|----------------|----------------|----------------|----------------|----------------|----------------|----------------|
| $A_1$    | $u=1$ | 0.7            | 0.8            | 0.6            | 0.9            | 0.9            | 0.9            | 0.9            |
|          | $u=2$ | 0.8            | 0.8            | 0.8            | 0.9            | 0.9            | 0.9            | 0.9            |
|          | $u=3$ | 0.8            | 0.8            | 0.8            | 0.9            | 0.9            | 0.9            | 0.9            |
|          | $u=4$ | 0.9            | 0.8            | 0.8            | 0.9            | 0.9            | 0.9            | 0.9            |
|          | $u=5$ | 1.0            | 1.0            | 1.0            | 1.0            | 1.0            | 1.0            | 1.0            |
| $A_2$    | $u=1$ | 0.9            | 0.4            | 0.4            | 0.6            | 0.9            | 0.9            | 0.9            |
|          | $u=2$ | 0.9            | 0.9            | 0.9            | 0.8            | 0.9            | 0.9            | 0.9            |
|          | $u=3$ | 0.9            | 0.9            | 0.9            | 0.8            | 0.9            | 0.9            | 0.9            |
|          | $u=4$ | 0.9            | 0.9            | 0.9            | 0.9            | 0.9            | 0.9            | 0.9            |
|          | $u=5$ | 1.0            | 1.0            | 1.0            | 1.0            | 1.0            | 1.0            | 1.0            |
| $A_3$    | $u=1$ | 0.9            | 0.4            | 0.4            | 0.9            | 0.9            | 0.9            | 0.9            |
|          | $u=2$ | 0.9            | 0.8            | 0.8            | 0.9            | 0.9            | 0.9            | 0.9            |
|          | $u=3$ | 0.9            | 0.9            | 0.9            | 0.9            | 0.9            | 0.9            | 0.9            |
|          | $u=4$ | 0.9            | 0.9            | 0.9            | 0.9            | 0.9            | 0.9            | 0.9            |
|          | $u=5$ | 1.0            | 1.0            | 1.0            | 1.0            | 1.0            | 1.0            | 1.0            |
| $A_4$    | $u=1$ | 0.9            | 0.9            | 0.7            | 0.9            | 0.9            | 0.9            | 0.9            |
|          | $u=2$ | 0.9            | 0.9            | 0.7            | 0.9            | 0.9            | 0.9            | 0.9            |
|          | $u=3$ | 0.9            | 0.9            | 0.9            | 0.9            | 0.9            | 0.9            | 0.9            |
|          | $u=4$ | 0.9            | 0.9            | 0.9            | 0.9            | 0.9            | 0.9            | 0.9            |
|          | $u=5$ | 1.0            | 1.0            | 1.0            | 1.0            | 1.0            | 1.0            | 1.0            |

**Table S11.** The weight of the criterion with the  $u^{th}$  largest value of  $EDF_i^g(u)$ .

| Students | u     | s <sub>6</sub> | s <sub>5</sub> | s <sub>4</sub> | s <sub>3</sub> | s <sub>2</sub> | s <sub>1</sub> | s <sub>0</sub> |
|----------|-------|----------------|----------------|----------------|----------------|----------------|----------------|----------------|
| $A_1$    | $u=1$ | 0.7            | 0.8            | 0.6            | 0.9            | 0.9            | 0.9            | 0.9            |
|          | $u=2$ | 0.1            | 0.0            | 0.2            | 0.0            | 0.0            | 0.0            | 0.0            |
|          | $u=3$ | 0.0            | 0.0            | 0.0            | 0.0            | 0.0            | 0.0            | 0.0            |
|          | $u=4$ | 0.1            | 0.0            | 0.0            | 0.0            | 0.0            | 0.0            | 0.0            |
|          | $u=5$ | 0.1            | 0.2            | 0.2            | 0.1            | 0.1            | 0.1            | 0.1            |
| $A_2$    | $u=1$ | 0.9            | 0.4            | 0.4            | 0.6            | 0.9            | 0.9            | 0.9            |
|          | $u=2$ | 0.0            | 0.5            | 0.5            | 0.2            | 0.0            | 0.0            | 0.0            |
|          | $u=3$ | 0.0            | 0.0            | 0.0            | 0.0            | 0.0            | 0.0            | 0.0            |
|          | $u=4$ | 0.0            | 0.0            | 0.0            | 0.1            | 0.0            | 0.0            | 0.0            |
|          | $u=5$ | 0.1            | 0.1            | 0.1            | 0.1            | 0.1            | 0.1            | 0.1            |
| $A_3$    | $u=1$ | 0.9            | 0.4            | 0.4            | 0.9            | 0.9            | 0.9            | 0.9            |
|          | $u=2$ | 0.0            | 0.4            | 0.4            | 0.0            | 0.0            | 0.0            | 0.0            |
|          | $u=3$ | 0.0            | 0.1            | 0.1            | 0.0            | 0.0            | 0.0            | 0.0            |
|          | $u=4$ | 0.0            | 0.0            | 0.0            | 0.0            | 0.0            | 0.0            | 0.0            |
|          | $u=5$ | 0.1            | 0.1            | 0.1            | 0.1            | 0.1            | 0.1            | 0.1            |
| $A_4$    | $u=1$ | 0.9            | 0.9            | 0.7            | 0.9            | 0.9            | 0.9            | 0.9            |
|          | $u=2$ | 0.0            | 0.0            | 0.0            | 0.0            | 0.0            | 0.0            | 0.0            |
|          | $u=3$ | 0.0            | 0.0            | 0.2            | 0.0            | 0.0            | 0.0            | 0.0            |
|          | $u=4$ | 0.0            | 0.0            | 0.0            | 0.0            | 0.0            | 0.0            | 0.0            |
|          | $u=5$ | 0.1            | 0.1            | 0.1            | 0.1            | 0.1            | 0.1            | 0.1            |

**Table S12.** The sensitivity analysis data by assigning  $C_1$  with varying values.

| The fuzzy measure of $C_1$ | 0.50    | 0.60    | 0.70    | 0.80    | 0.90    | 0.95    |
|----------------------------|---------|---------|---------|---------|---------|---------|
| A <sub>1</sub>             | 86.6667 | 86.6667 | 86.6667 | 86.6667 | 86.6667 | 86.6667 |
| A <sub>2</sub>             | 59.1667 | 60.0000 | 60.1667 | 60.3333 | 60.8333 | 61.0833 |
| A <sub>3</sub>             | 65.1667 | 66.3333 | 67.3333 | 68.7333 | 70.3333 | 70.8333 |
| A <sub>4</sub>             | 67.0000 | 67.1667 | 67.3333 | 67.8333 | 69.0000 | 69.5833 |

**Table S13.** The sensitivity analysis data by assigning  $C_2$  with varying values.

| The fuzzy measure of $C_2$ | 0.40    | 0.50    | 0.60    | 0.70    | 0.80    |
|----------------------------|---------|---------|---------|---------|---------|
| A <sub>1</sub>             | 86.6667 | 86.6667 | 86.6667 | 86.6667 | 86.6667 |
| A <sub>2</sub>             | 60.8333 | 60.8333 | 60.8333 | 60.8333 | 60.8333 |
| A <sub>3</sub>             | 70.3333 | 70.3333 | 70.3333 | 70.3333 | 70.3333 |
| A <sub>4</sub>             | 69.0000 | 69.0000 | 69.0000 | 69.0000 | 69.0000 |

**Table S14.** The sensitivity analysis data by assigning  $C_3$  with varying values.

| The fuzzy measure of $C_3$ | 0.60    | 0.70    | 0.80    | 0.90    | 0.95    |
|----------------------------|---------|---------|---------|---------|---------|
| A <sub>1</sub>             | 84.5000 | 84.6667 | 86.6667 | 88.6667 | 89.6667 |
| A <sub>2</sub>             | 60.1667 | 60.5000 | 60.8333 | 61.1667 | 61.5000 |
| A <sub>3</sub>             | 66.6667 | 68.5000 | 70.3333 | 72.1667 | 73.5833 |
| A <sub>4</sub>             | 69.0000 | 69.0000 | 69.0000 | 69.0000 | 69.1667 |

**Table S15.** The sensitivity analysis data by assigning  $C_4$  with varying values.

| The fuzzy measure of $C_4$ | 0.50    | 0.60    | 0.70    | 0.80    | 0.90    |
|----------------------------|---------|---------|---------|---------|---------|
| A <sub>1</sub>             | 86.0000 | 86.3333 | 86.6667 | 87.0000 | 89.1667 |
| A <sub>2</sub>             | 60.8333 | 60.8333 | 60.8333 | 60.8333 | 60.8333 |
| A <sub>3</sub>             | 70.3333 | 70.3333 | 70.3333 | 70.3333 | 70.3333 |
| A <sub>4</sub>             | 68.0000 | 68.5000 | 69.0000 | 69.5000 | 70.0000 |

**Table S16.** The sensitivity analysis data by assigning  $C_5$  with varying values.

| The fuzzy measure of $C_5$ | 0.20    | 0.30    | 0.40    | 0.50    | 0.60    |
|----------------------------|---------|---------|---------|---------|---------|
| A <sub>1</sub>             | 86.6667 | 86.6667 | 86.6667 | 86.6667 | 86.6667 |
| A <sub>2</sub>             | 58.1667 | 59.5000 | 60.8333 | 62.1667 | 64.0000 |
| A <sub>3</sub>             | 68.6667 | 69.5000 | 70.3333 | 71.1667 | 72.0000 |
| A <sub>4</sub>             | 69.0000 | 69.0000 | 69.0000 | 69.0000 | 69.0000 |
