# Supplementary material
Source: MDPI journal article supplement (https://www.mdpi.com/2071-1050/16/4/1389)
Supplement: s1 [file s1]

Archive with 4 entries (4 files):
- Questionnaire.pdf
- scores_calculation.m
- Supplementary Tables S1-S5.xlsx
- Supplementary Tables S6-S16.pdf
