# Supplementary material
Source: MDPI journal article supplement (https://www.mdpi.com/2071-1050/16/4/1389)
Supplement: s1 [file s1 › Supplementary Tables S1-S5.xlsx]

## Sheet: Table S1
Supplementary Table S1. Description of five projects in online PBL course of Sustainable Decision Analysis.
Project No.	Name of Project	Theme and Objective	Difficulty and Complexity	Practicality and Applicability	Evaluation Emphasis	Innovativeness and Explorativeness
P1	Local Environmental Impact Analysis	This project focuses on analyzing the environmental impact of a local development project. The objective is to enhance students' understanding of environmental assessment techniques and apply them to a real-world scenario.	Moderate. It involves understanding basic environmental assessment methods and their application to a specific project.	Students work on a real-world development project and conduct an environmental impact assessment, including identification of potential impacts, mitigation measures, and stakeholder engagement.	Applicability of learned techniques to the project, thoroughness of assessment, and effective stakeholder engagement.	Encouragement of alternative assessment methods and creative solutions to environmental impact management.
P2	Green Infrastructure Planning	This project deals with planning green infrastructure components such as parks, green roofs, and urban forests. The objective is to introduce students to green infrastructure planning methods and their benefits for sustainable urban development.	Moderate to high. It involves understanding green infrastructure planning frameworks, ecological design principles, and integration with urban planning processes.	Students plan green infrastructure components for a given urban area, considering ecological, social, and economic benefits.	Integration of green infrastructure into urban planning, consideration of sustainability objectives, and innovative planning solutions.	Promotion of innovative green infrastructure design concepts and their integration into existing urban systems.
P3	Green Building Design and Evaluation	This project focuses on the design and assessment of green buildings. The objective is to cultivate students' sustainable design thinking in architecture and enable them to grasp the green building assessment criteria and methods.	Moderate. It involves comprehensive knowledge of architectural design and assessment.	Students are required to design and assess a green building project, taking into account actual needs and resources for optimization.	Students' understanding and application of green building design principles and assessment criteria.	Encouragement of innovative design concepts and technologies, and the proposal of forward-looking green building solutions.
P4	Renewable Energy Project Feasibility Analysis	This project focuses on the feasibility analysis of renewable energy projects. The objective is to enhance students' understanding of renewable energy technologies and their application in real-world scenarios.	High. It involves understanding various renewable energy technologies, their applications, and the associated technical, economic, and environmental factors.	Students analyze the potential of a renewable energy source in a given location, conduct a feasibility study, and develop a project proposal including cost estimation and expected outcomes.	Technical feasibility of the proposed project, economic viability, environmental sustainability, and comprehensive project planning.	Encouragement of innovative renewable energy technologies and their integration with existing energy systems.
P5	Resource Allocation for Sustainable Development	This project focuses on optimizing resource allocation for sustainable development. The objective is to familiarize students with sustainable decision-making processes and methods for allocating resources effectively.	Moderate. It involves understanding basic principles of resource allocation and their application to sustainable development.	Students work on a real-world scenario of resource allocation for sustainable development, considering environmental, social, and economic factors.	Application of sustainable decision-making methods, resource allocation optimization, and consideration of all relevant factors.	Encouragement of innovative resource allocation strategies and consideration of future sustainability challenges.

## Sheet: Table S2
Supplementary Table S2. The individual details of 15 teachers engaged in the surveys of criteria importance evaluation.
Teacher No.	Age Range	Gender	Educational Level	Online PBL Course Experience (years)	Major/ Research Areas	Additional Information
T1	25-34	Female	PhD	2	Electrical Engineering	Excellent course delivery
T2	35-44	Male	Master	4	Green Project Management	Experienced in various PBL settings
T3	45-54	Female	PhD	4	Green Project Management	Innovative in online PBL approach
T4	25-34	Male	Master	4.5	Green Project Management	/
T5	35-44	Male	PhD	3	Mechanical Engineering	Adept at facilitating group discussions
T6	45-54	Female	Master	1.5	Civil Engineering	/
T7	25-34	Female	PhD	2	Electrical Engineering	/
T8	35-44	Male	PhD	2	Environmental Engineering	Strong facilitator of critical thinking
T9	45-54	Male	PhD	2	Civil Engineering	Experienced in online PBL delivery
T10	25-34	Female	PhD	4	Green Project Management	/
T11	35-44	Male	Master	1.5	Biomedical Engineering	Skilled at motivating students in online PBL
T12	45-54	Female	Master	2	Environmental Engineering	/
T13	25-34	Male	PhD	3	Environmental Engineering	/
T14	35-44	Female	Master	4	Green Project Management	Experienced in online PBL collaborations
T15	45-54	Male	PhD	2	Biomedical Engineering	Skilled at integrating technology in onine PBL learning activities

## Sheet: Table S3
Supplementary Table S3. The individual details of 20 students engaged in the surveys of criteria importance evaluation.
Student No.	Age Range	Gender	Educational Stage	Online PBL Course Experience (semesters)	Major/ Research Areas	Additional Information
S1	18-19	Female	Undergraduate	3	Civil Engineering	Highly engaged in online PBL activities
S2	18-19	Female	Undergraduate	2	Civil Engineering	/
S3	18-19	Male	Undergraduate	4	Engineering Management	Highly critical thinker in PBL
S4	20-21	Male	Undergraduate	1	Engineering Management	New to online PBL but quickly adapted
S5	20-21	Male	Undergraduate	3	Environmental Engineering	Adept at facilitating group discussions
S6	20-21	Male	Undergraduate	1	Civil Engineering	/
S7	22-23	Male	Undergraduate	2	Environmental Engineering	/
S8	22-23	Male	Undergraduate	2	Engineering Management	Strong facilitator of critical thinking
S9	22-23	Male	Master	2	Construction Project Management	Strong project manager in PBL
S10	24-25	Female	Master	1.5	Engineering Management	/
S11	24-25	Male	Master	2	Engineering Management	Skilled at leading group discussions
S12	24-25	Female	Master	1	Engineering Management	/
S13	26-27	Male	Master	3	Engineering Management	Highly motivated and self-directed in inline PBL
S14	26-27	Female	PhD	2	Engineering Management	Skilled at working independently in online PBL
S15	26-27	Male	PhD	1	Engineering Management	/
S16	26-27	Male	Master	1	Civil Engineering	/
S17	28-29	Male	Master	1	Civil Engineering	/
S18	28-29	Female	PhD	1.5	Civil Engineering	Skilled at leading group discussions
S19	28-29	Male	PhD	1	Civil Engineering	/
S20	28-29	Male	PhD	1	Civil Engineering	/

## Sheet: Table S4
Supplementary Table S4. The converted data based on the results of questionnaire surveys on the importance of gleaned criteria.
Criteria	T1	T2	T3	T4	T5	T6	T7	T8	T9	T10	T11	T12	T13	T14	T15	S1	S2	S3	S4	S5	S6	S7	S8	S9	S10	S11	S12	S13	S14	S15	S16	S17	S18	S19	S20	Mean		Criteria	Mean
Technical competency (B1)	3	2	4	3	4	3	3	2	2	3	2	2	3	3	3	3	3	2	3	4	1	4	2	2	3	3	3	2	4	2	3	3	3	3	4	2.82857		Technical competency (B1)	2.82857
Knowledge application (B2)	4	4	4	3	4	4	4	4	4	4	3	3	4	3	4	4	4	3	3	3	3	2	3	3	2	3	3	3	3	3	3	3	3	3	4	3.34286		Knowledge application (B2)	3.34286
Collaboration and contribution (B3)	2	3	2	3	3	4	4	3	2	4	3	4	4	4	3	4	4	3	3	4	4	4	4	4	4	4	4	4	4	4	3	4	4	3	3	3.51429		Collaboration and contribution (B3)	3.51429
Online engagement (B4)	4	3	4	3	3	2	2	4	4	3	3	2	3	3	3	2	3	4	2	4	4	2	3	4	2	3	4	3	3	2	2	3	4	3	3	3.02857		Online engagement (B4)	3.02857
Sustained learning (B5)	3	2	2	2	1	0	1	2	1	2	2	3	4	2	3	2	3	2	1	2	3	4	3	2	2	2	2	3	4	2	1	2	3	2	1	2.17143		Sustained learning (B5)	2.17143
Mastery of content (B6)	4	2	4	4	3	2	4	2	4	3	4	4	4	4	4	4	4	4	4	4	4	3	2	4	3	4	4	4	4	4	4	4	4	4	3	3.62857		Mastery of content (B6)	3.62857
Critical thinking (B7)	4	3	3	2	4	3	4	2	3	4	3	3	4	2	3	2	2	2	2	2	3	3	2	2	3	3	2	3	3	3	2	2	2	2	4	2.74286		Critical thinking (B7)	2.74286
Problem-solving skills (B8)	2	2	2	3	3	3	2	3	2	3	3	3	2	2	2	2	1	2	3	2	3	2	1	2	1	2	1	3	4	2	3	2	1	3	3	2.28571		Problem-solving skills (B8)	2.28571
Time management (B9)	1	2	3	2	2	2	2	3	3	4	3	4	2	1	2	2	3	3	3	2	2	1	2	1	1	2	2	2	2	2	3	2	2	2	2	2.2		Time management (B9)	2.2
Reflection and learning (B10)	4	3	4	4	3	3	2	3	2	3	1	2	1	2	2	2	2	2	2	2	2	3	2	1	1	2	1	2	1	1	2	1	1	4	3	2.17143		Reflection and learning (B10)	2.17143
Sustainability integration (B11)	4	4	4	3	4	4	4	1	1	1	3	3	4	3	4	4	4	3	3	3	3	2	3	3	2	4	4	3	4	4	3	4	4	3	4	3.25714		Sustainability integration (B11)	3.25714

## Sheet: Table S5
Supplementary Table S5. A conversion from different range of scores to linguistic variables.
Score range	Linguistic expression	linguistic variable
[90,100)	“extremely good”	s6
[80,90)	“good”	s5
[70,80)	“slightly good”	s4
[60,70)	“medium”	s3
[50,60)	“slightly poor”	s2
[40,50)	“poor”	s1
[0,40)	“extremely poor”	s0
